# Supplementary material for: Metformin suppresses pro-inflammatory cytokines in vitreous of diabetes patients and human retinal vascular endothelium
Source: PubMed Central journal article supplement (PMC9269956; doi:10.1371/journal.pone.0268451), 2022-07-08

Human Cytokine Array  
non-diabetic control

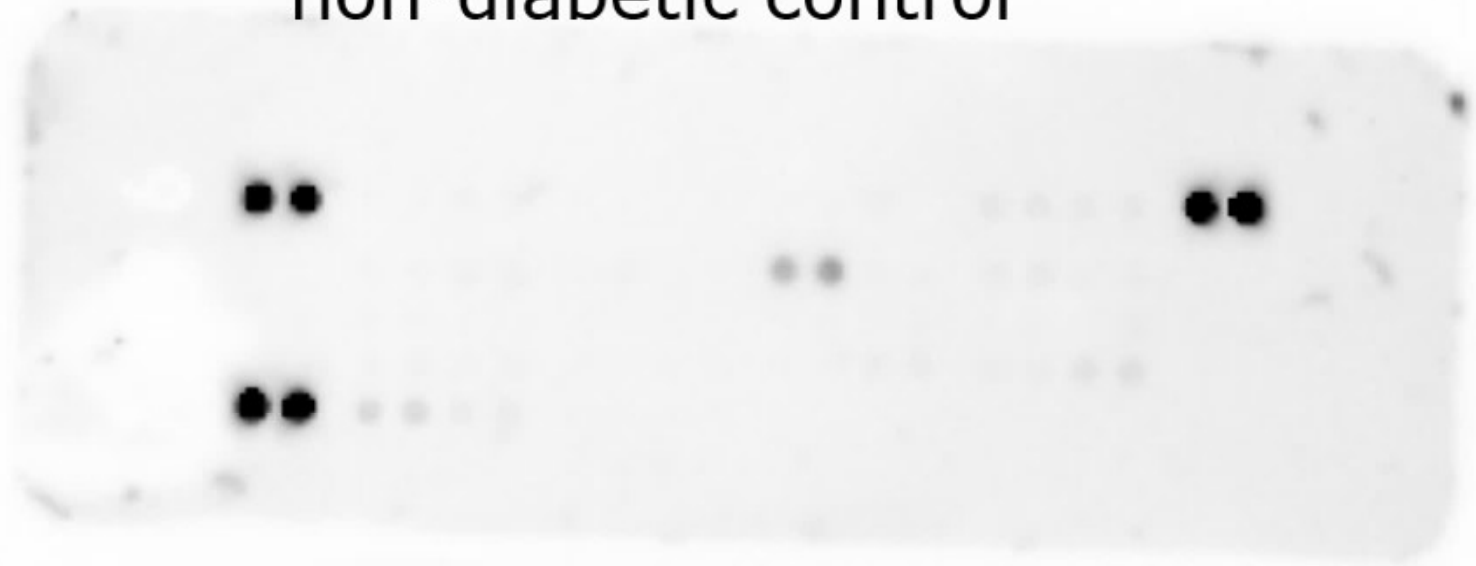

Human Cytokine Array  
non-metformin treated PDR

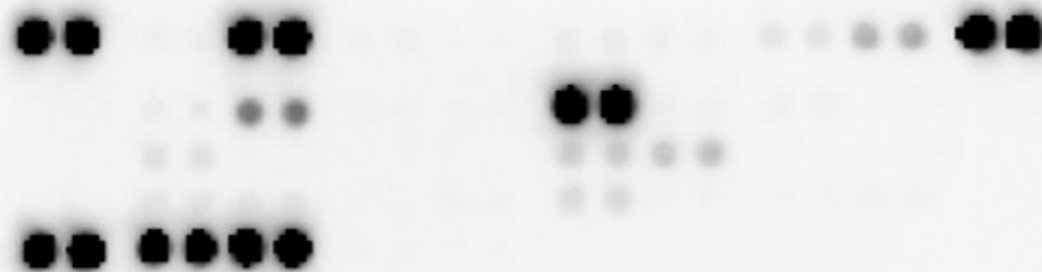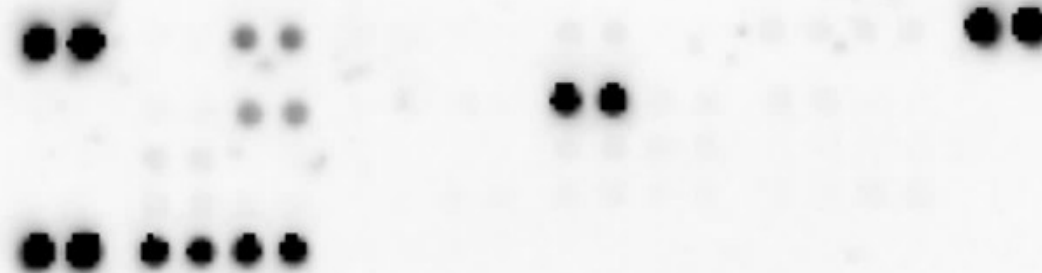

# Human Cytokine Array Metformin treated PDR

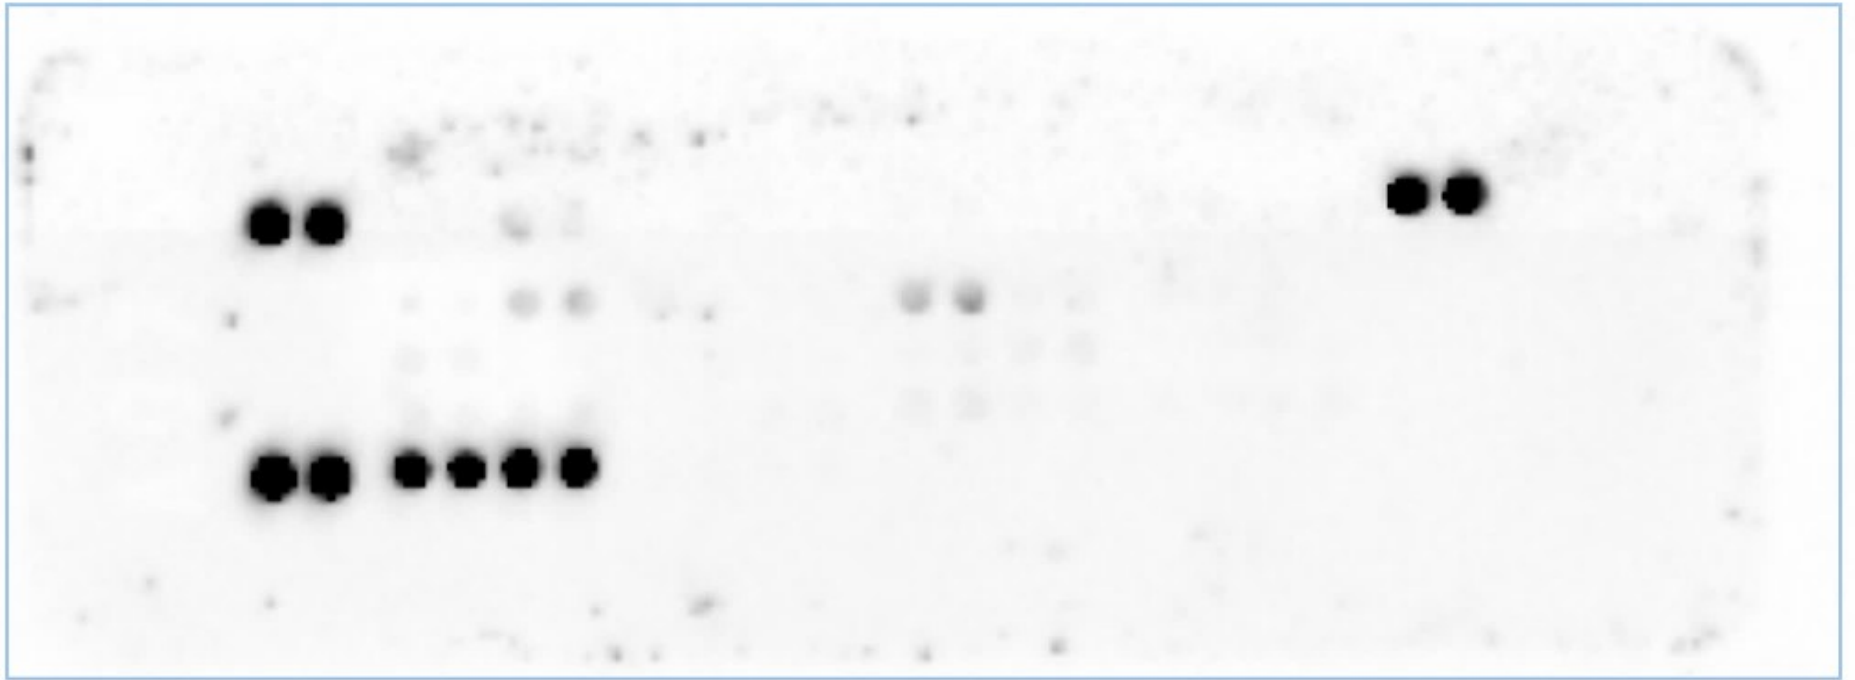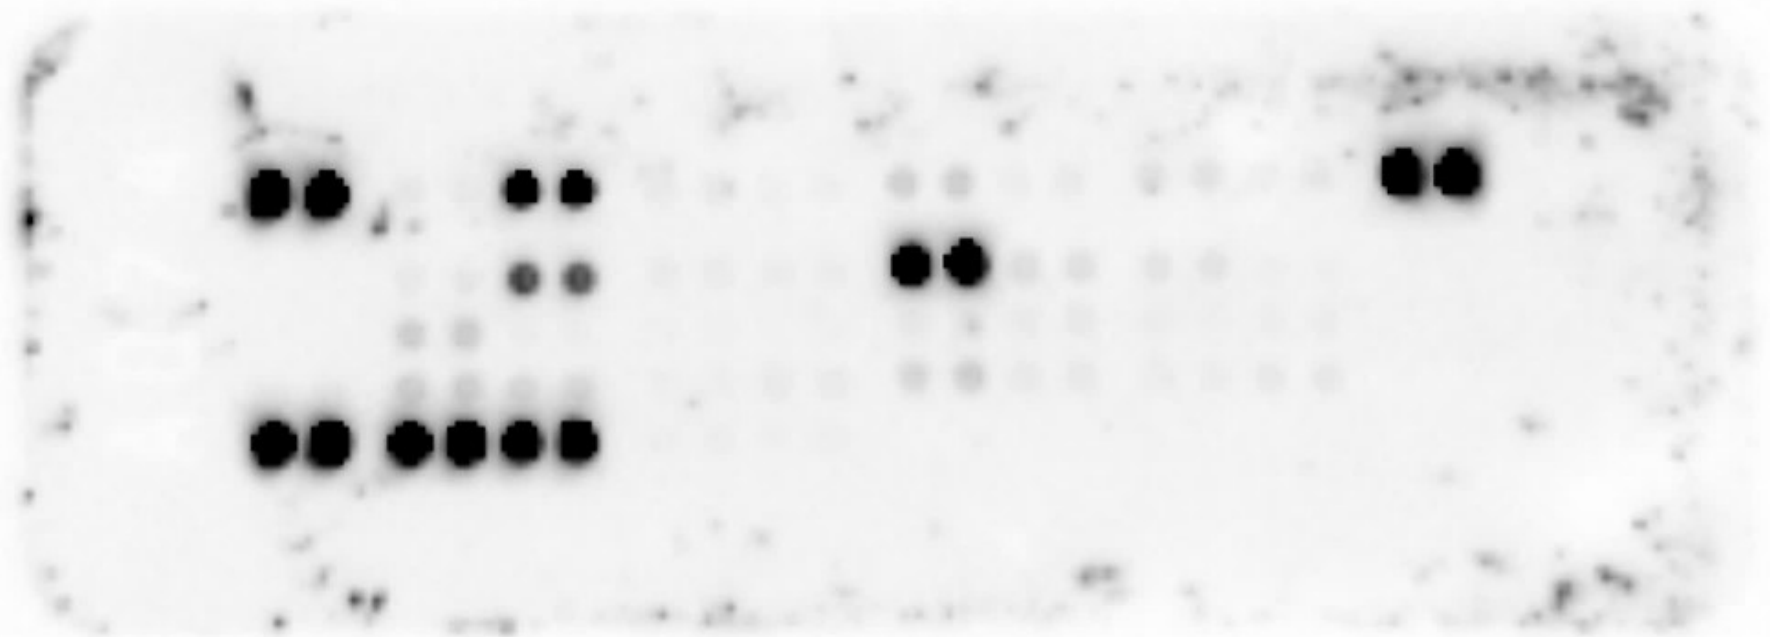

ACTIN

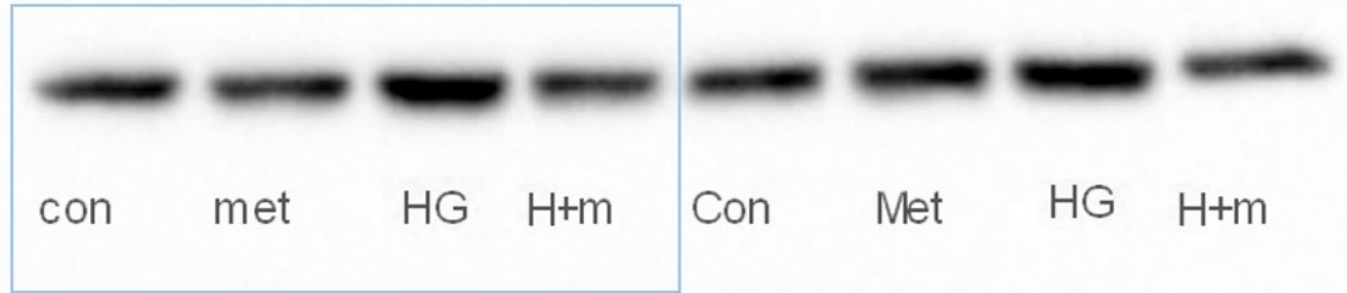

pAMPK

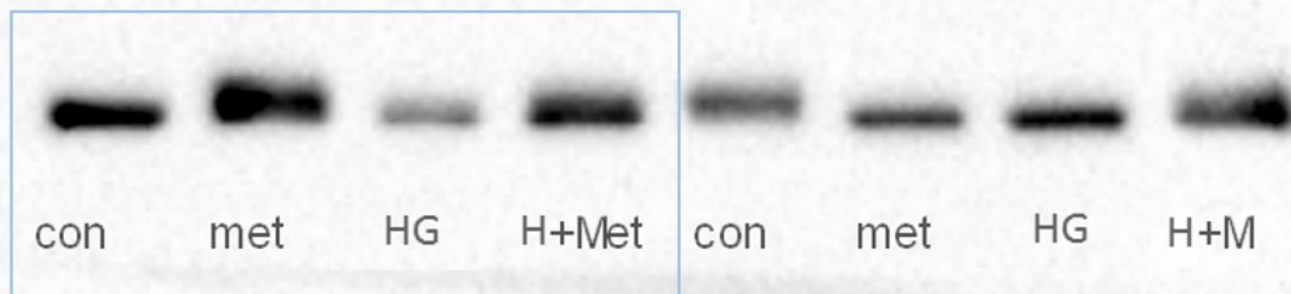

ACTIN of p-7,9HG +Met+CC in hRVEC

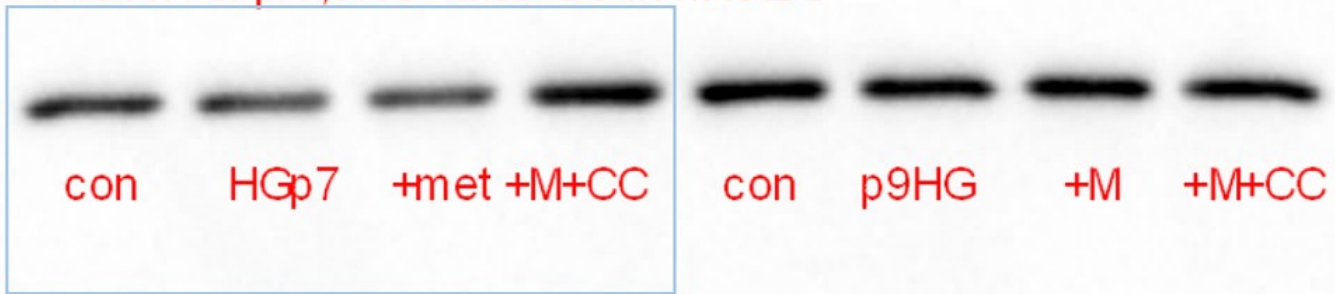

ICAM1 of p-7,9HG +Met+CC in hRVEC

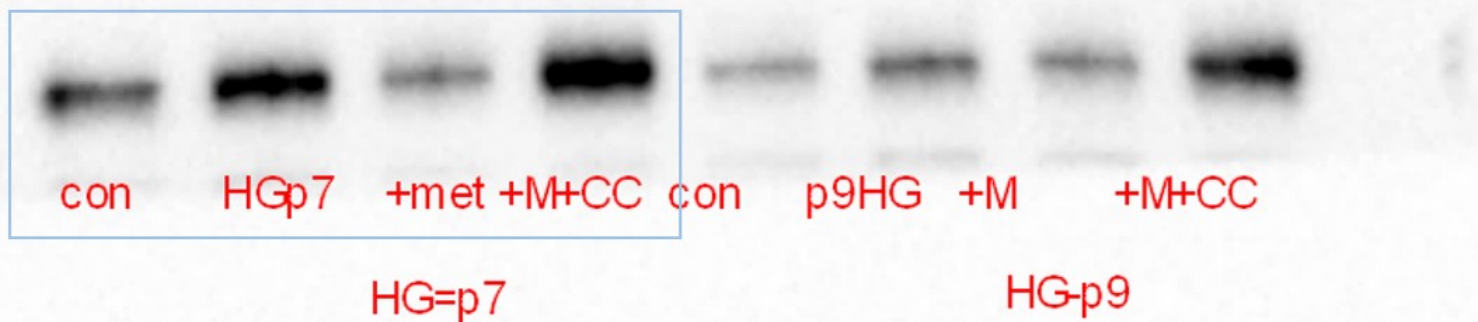

p-NFkB of p-7,9HG +Met+CC in hRVEC

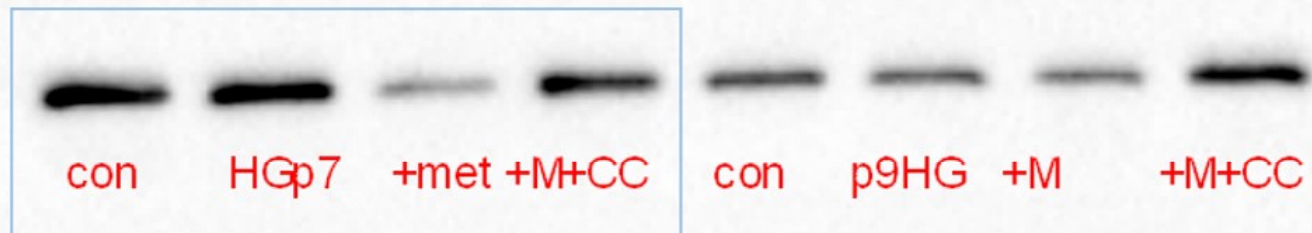



Actin of P7 HG+Met+B/M/P

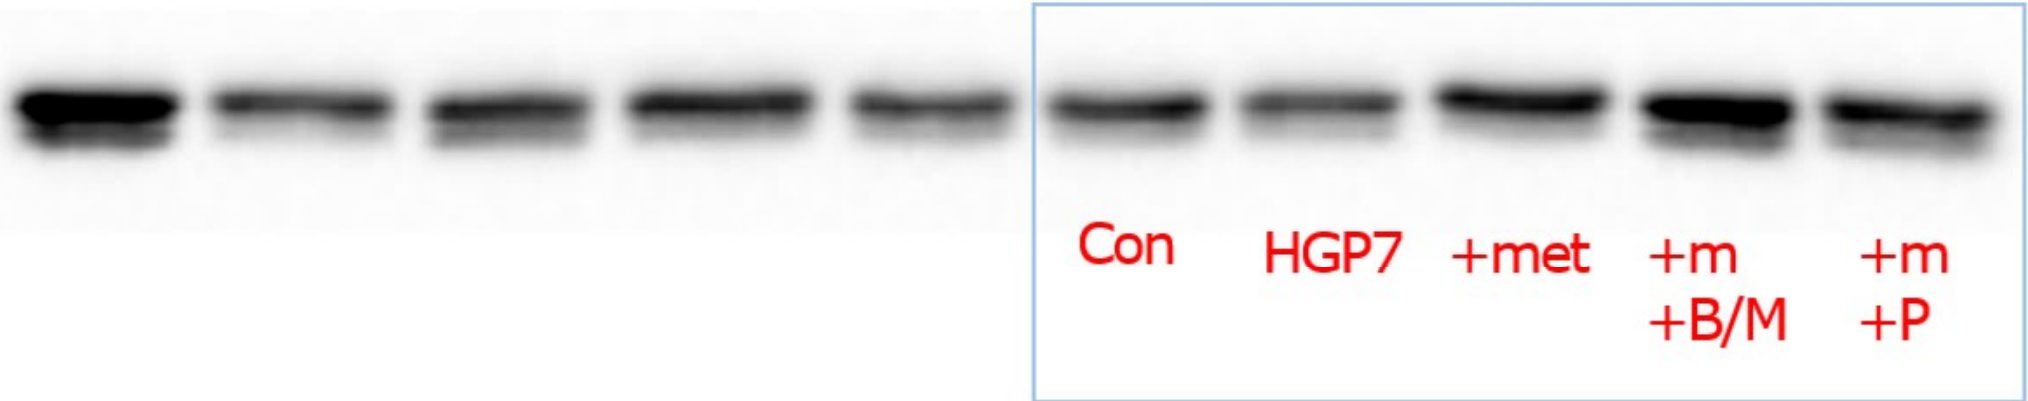

## ICAM-1 , P7 HG+Met+B/M/P

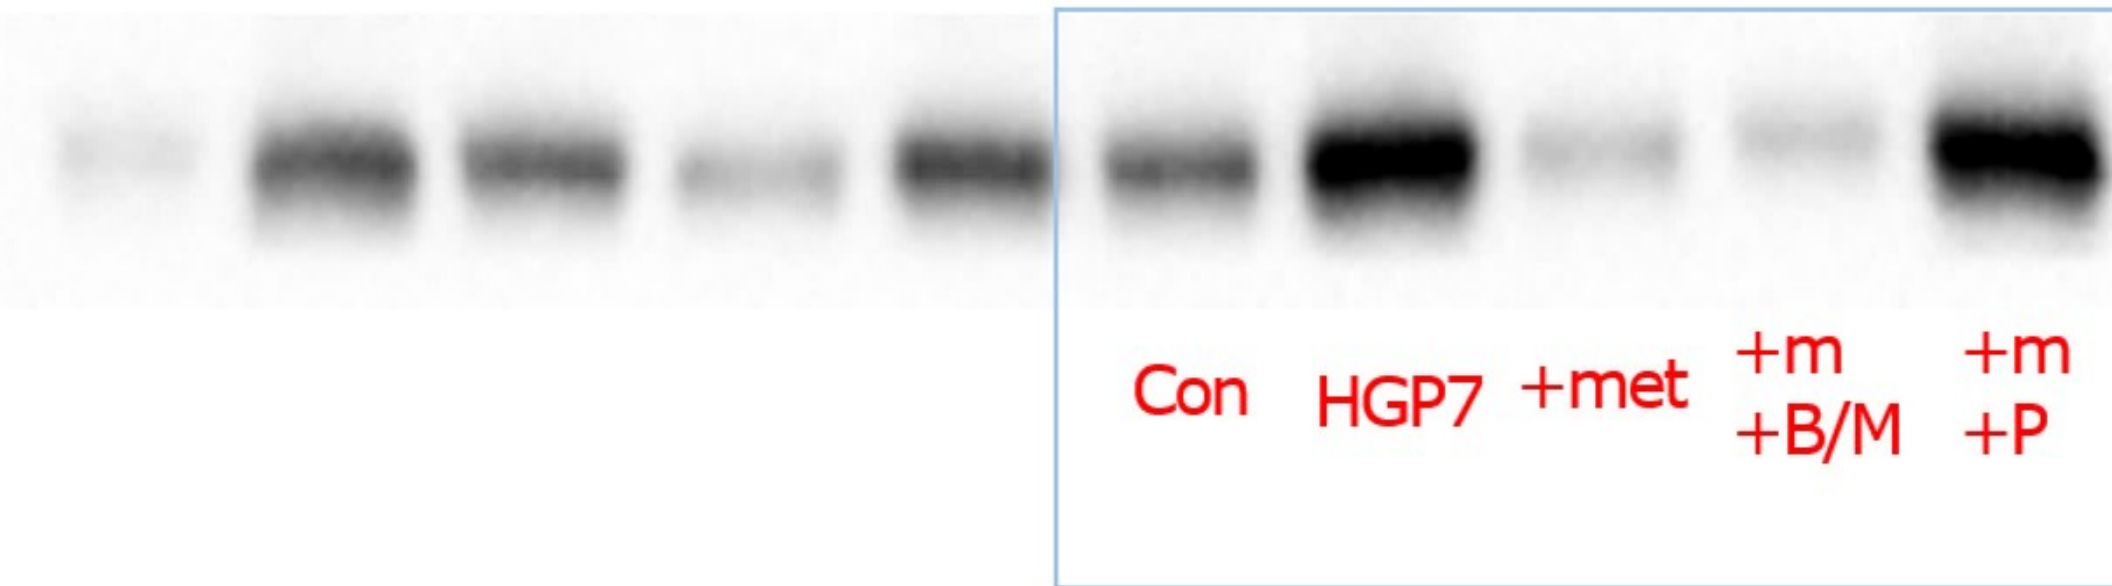

pNFkB, P7 HG+Met+B/M/P

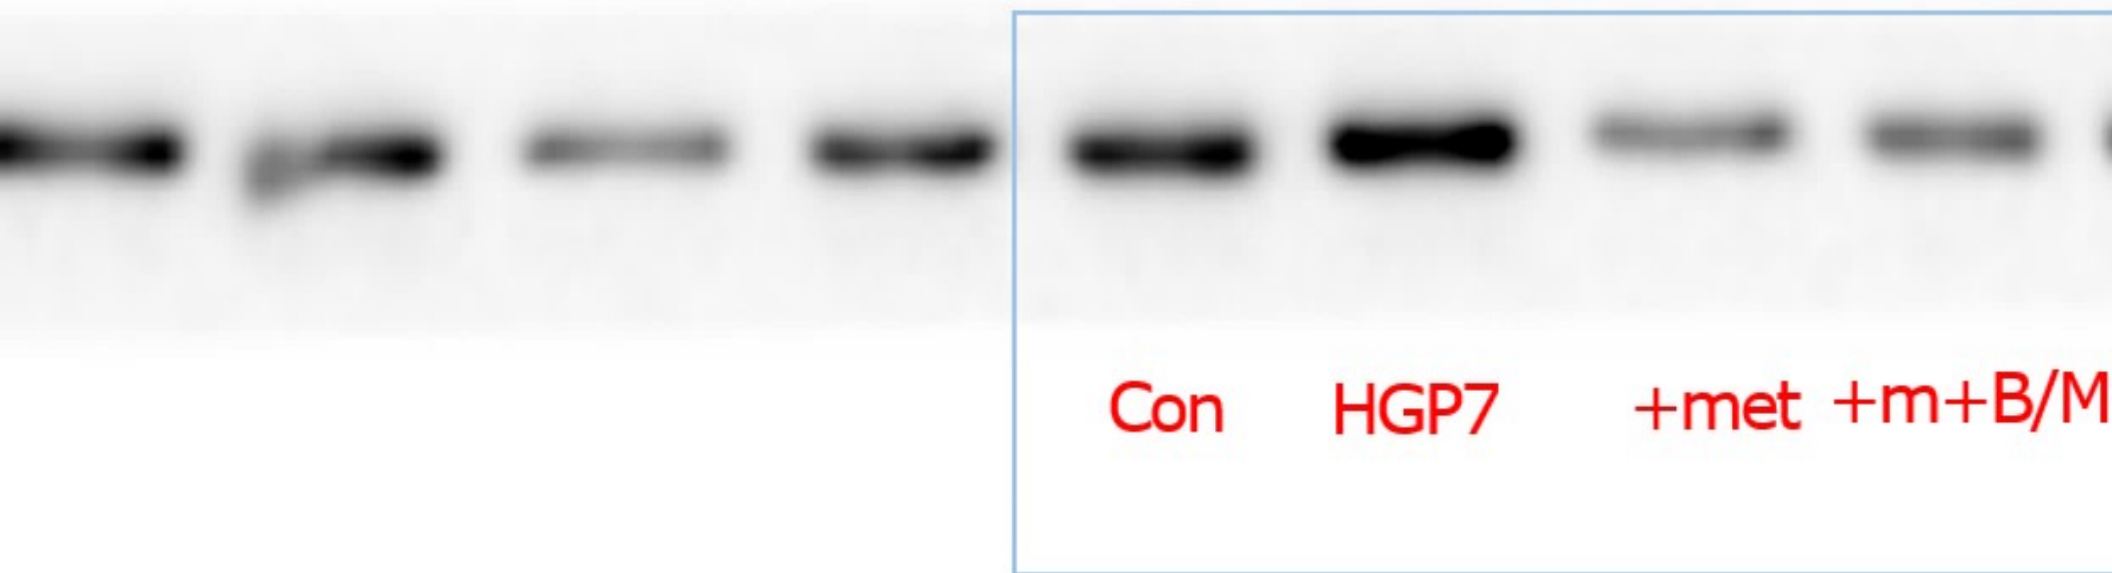

Supplement: pone.0268451.s002.pdf [file pone.0268451.s002.pdf]
